# Supplementary figures and images for: Combination of EphA2- and Wee1-Targeted Therapies in Endometrial Cancer
Source: MDPI journal article supplement (doi:10.3390/ijms24043915), 2023-02-15

**A** **Figure S1**

Hec1A

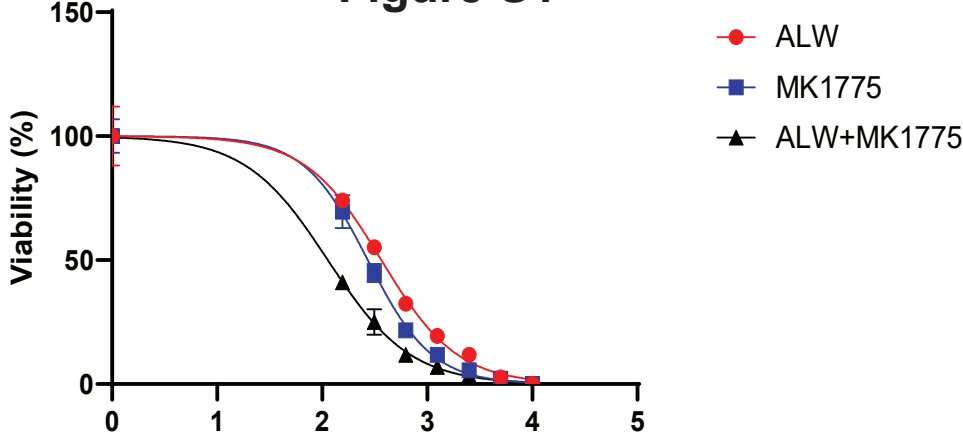

**B**

Ishikawa

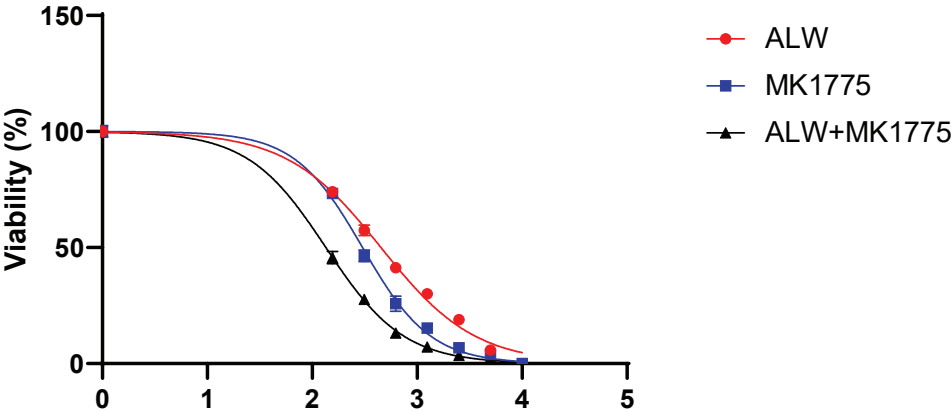

**C**

Hec1A 24H CELL CYCLE

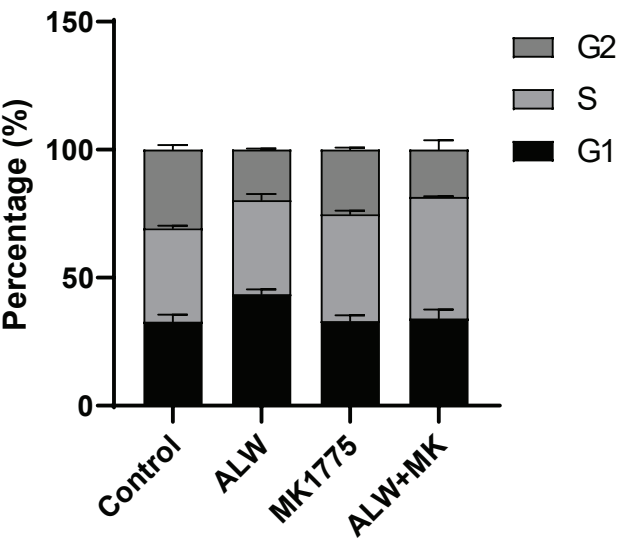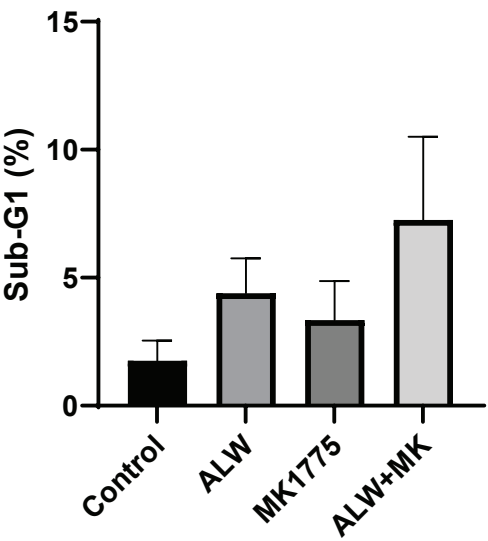

**D**

ISHIKAWA 24H CELL CYCLE

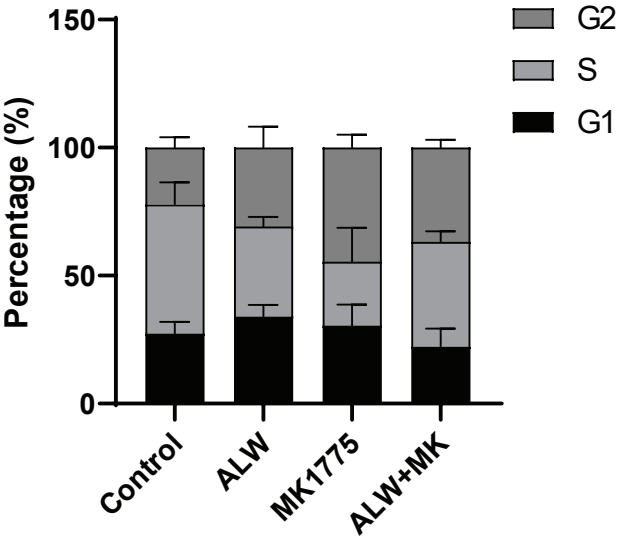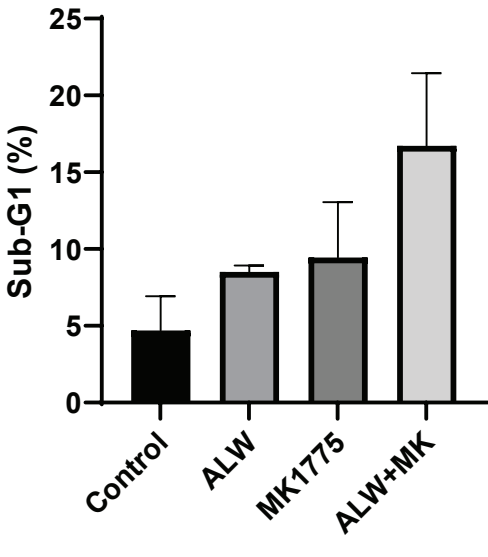

**A****Figure S2**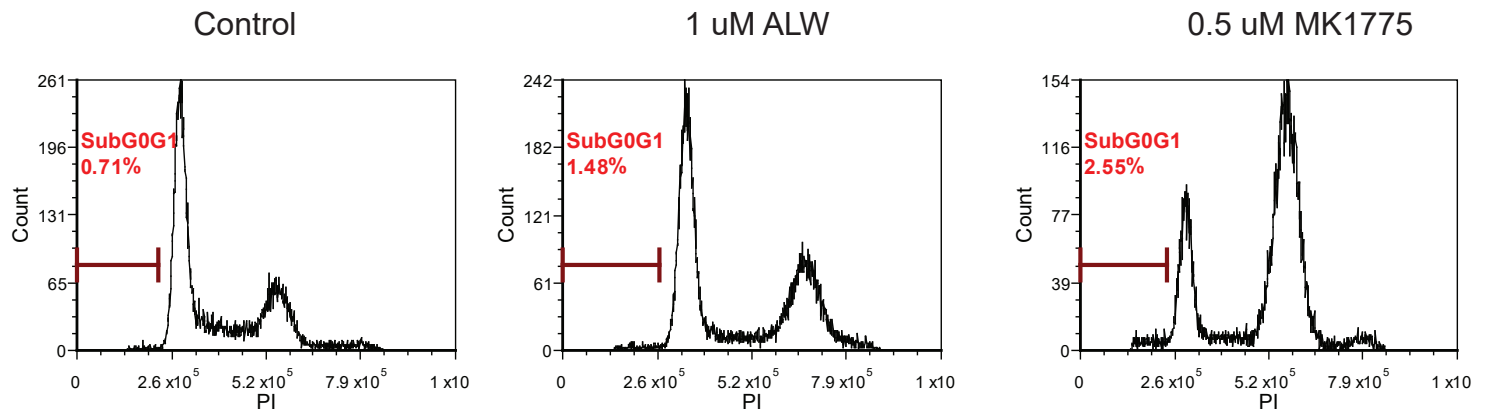**B**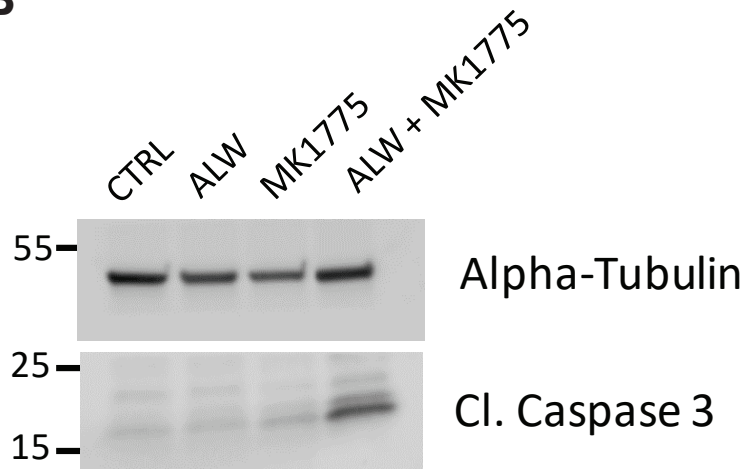**C**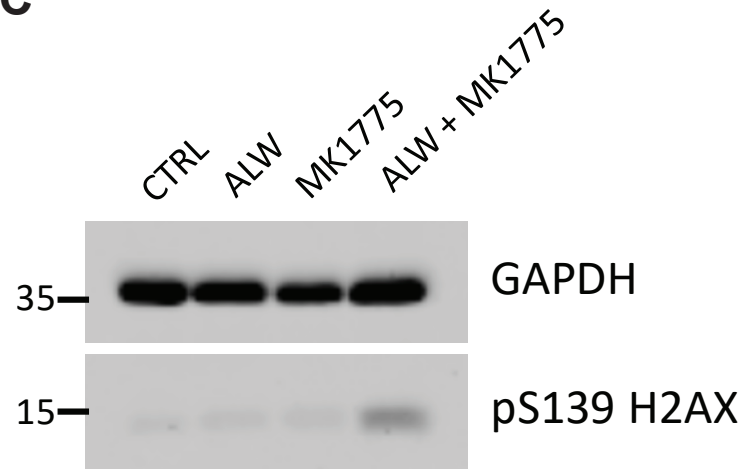

Supplement: s1 [file s1]
